# Supplementary material
Source: Springer Nature journal article supplement (https://www.springermedizin.de/resource/supplementary/12974_2010_227_MOESM5_ESM.pdf/9601036)
Supplement: MOESM5 [file 9601036]

# 60min MCAO: neurological deficit

## 24h reperfusion

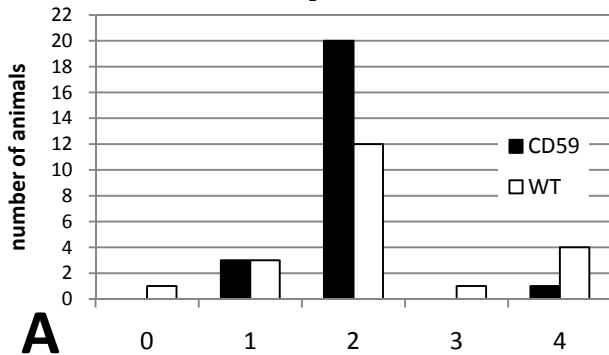

## 48h reperfusion

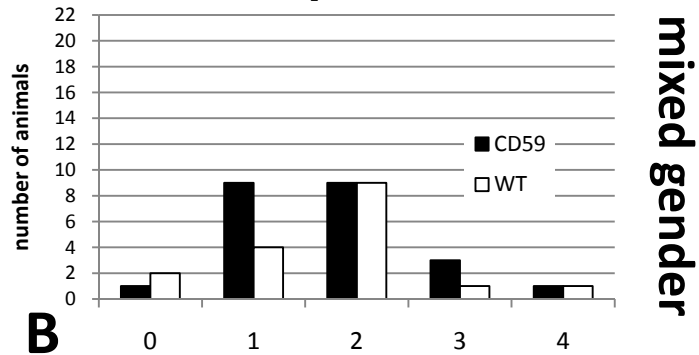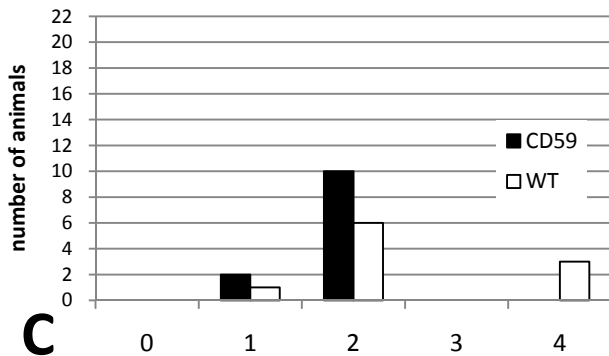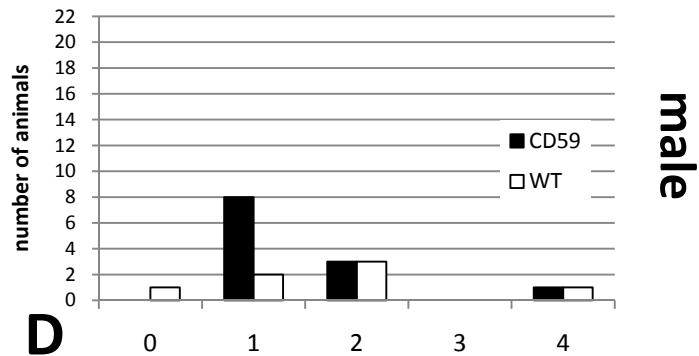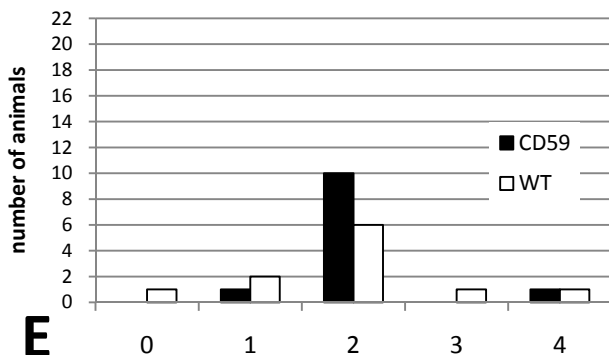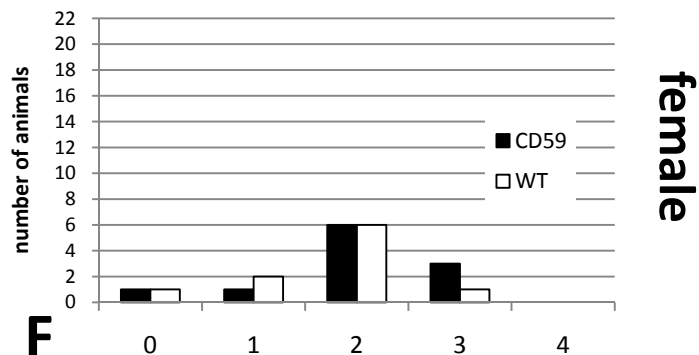

severity of neurological deficit

severity of neurological deficit
